# Supplementary material
Source: Springer Nature journal article supplement (https://www.springermedizin.de/resource/supplementary/12913_2006_382_MOESM3_ESM.pdf/9535064)
Supplement: MOESM3 [file 9535064]

Table 3. Two-part models of general practitioner, specialist, and hospital services

| Variable                        | General practitioners |                                  | Specialists |                                  | Hospitals |                                  |
|---------------------------------|-----------------------|----------------------------------|-------------|----------------------------------|-----------|----------------------------------|
|                                 | Logistic              | Zero-truncated negative binomial | Logistic    | Zero-truncated negative binomial | Logistic  | Zero-truncated negative binomial |
|                                 | OR                    | IRR                              | OR          | IRR                              | OR        | IRR                              |
| Age                             |                       | ***                              |             | ***                              |           | ***                              |
| 20-24                           | 1.00                  | 1.00                             | 1.00        | 1.00                             | 1.00      | 1.00                             |
| 25-29                           | 1.18                  | 1.01                             | 0.97        | 1.31 **                          | 1.06      | 0.92                             |
| 30-34                           | 0.89                  | 0.89 **                          | 1.04        | 1.14                             | 0.89      | 1.04                             |
| 35-39                           | 0.73 **               | 0.83 ***                         | 0.83 *      | 1.06                             | 0.72 **   | 1.17                             |
| 40-44                           | 0.72 ***              | 0.76 ***                         | 0.73 ***    | 1.01                             | 0.62 ***  | 0.96                             |
| 45-49                           | 0.68 ***              | 0.75 ***                         | 0.76 **     | 0.86                             | 0.58 ***  | 1.26                             |
| 50-54                           | 0.80 *                | 0.76 ***                         | 0.82 *      | 0.86                             | 0.59 ***  | 1.62 **                          |
| 55-59                           | 0.81 *                | 0.72 ***                         | 0.77 **     | 0.78 **                          | 0.68 **   | 1.67 **                          |
| 60-64                           | 0.79 *                | 0.68 ***                         | 0.72 ***    | 0.85 *                           | 0.71 **   | 1.45 *                           |
| 65-69                           | 0.73 *                | 0.56 ***                         | 0.45 ***    | 0.60 ***                         | 1.02      | 2.02 **                          |
| 70-74                           | 0.88                  | 0.53 ***                         | 0.43 ***    | 0.51 ***                         | 0.92      | 2.33 ***                         |
| 75-79                           | 0.81                  | 0.58 ***                         | 0.43 ***    | 0.52 ***                         | 1.07      | 2.29 ***                         |
| 80+                             | 0.96                  | 0.61 ***                         | 0.27 ***    | 0.46 ***                         | 1.18      | 2.73 ***                         |
| Sex                             | 0.35 ***              | 0.74 ***                         | 0.44 ***    | 1.00                             | 0.67 **   | 1.20                             |
| Sex x age^A                     |                       | ***                              |             | *                                |           | ***                              |
| Minority                        | 1.26 ***              | 1.14 ***                         | 0.95        | 0.73 ***                         | 0.76 ***  | 0.90                             |
| Education                       |                       | *                                |             | ***                              |           | ***                              |
| Post-secondary graduate         | 1.00                  | 1.00                             | 1.00        | 1.00                             | 1.00      | 1.00                             |
| Secondary graduate              | 0.99                  | 1.04 **                          | 0.91 ***    | 0.98                             | 1.01      | 0.98                             |
| Less than secondary education   | 0.90 **               | 1.08 ***                         | 0.74 ***    | 0.91 *                           | 1.05      | 0.96                             |
| Currently in school             | 1.10                  | 0.92                             | 1.03        | 1.09                             | 0.74      | 1.58                             |
| Missing                         | 1.01                  | 1.07                             | 0.86        | 0.95                             | 1.01      | 1.18                             |
| Sex x education                 |                       | *                                |             | **                               |           | *                                |
| Home ownership                  |                       | ***                              |             | ***                              |           | **                               |
| Own the dwelling                | 1.00                  | 1.00                             | 1.00        | 1.00                             | 1.00      | 1.00                             |
| Do not own the dwelling         | 0.96                  | 1.08 ***                         | 0.99        | 1.15 ***                         | 1.14 **   | 1.13 **                          |
| Missing                         | 0.70                  | 1.02                             | 0.82        | 0.82                             | 1.37      | 1.00                             |
| Household income                |                       | ***                              |             | **                               |           | *                                |
| Highest                         | 1.00                  | 1.00                             | 1.00        | 1.00                             | 1.00      | 1.00                             |
| Upper middle                    | 0.93 *                | 1.06 **                          | 0.87 ***    | 0.98                             | 0.97      | 1.07                             |
| Middle                          | 0.83 ***              | 1.06 **                          | 0.79 ***    | 0.92                             | 0.94      | 1.17 *                           |
| Lower middle                    | 0.79 ***              | 1.11 ***                         | 0.76 ***    | 0.90                             | 0.93      | 1.25 **                          |
| Lowest                          | 0.70 ***              | 1.12 **                          | 0.67 ***    | 0.97                             | 1.06      | 1.29 *                           |
| Missing                         | 0.87 **               | 1.05                             | 0.83 **     | 0.96                             | 0.95      | 1.21 *                           |
| Sex x income                    |                       | *                                |             | *                                |           | *                                |
| Self-help group participation^  | 1.30 **               | 1.18 ***                         | 1.36 ***    | 1.28 ***                         | 1.34 ***  | 1.41 ***                         |
| Sense of belonging to community |                       | **                               |             |                                  |           |                                  |
| Yes                             | 1.00                  | 1.00                             | 1.00        | 1.00                             | 1.00      | 1.00                             |
| No                              | 0.88 ***              | 0.97 *                           | 0.96        | 1.01                             | 0.94      | 1.04                             |
| Missing                         | 0.64 **               | 0.91                             | 0.91        | 0.80                             | 1.00      | 0.86                             |
